# Supplementary material
Source: publisher site journal article supplement (https://www.dovepress.com/article/235430)
Supplement: Supplementary file 1 [file get_supplementary_file.php]

**Appendix - Preference section of survey**

**UNDERSTANDING THE PREFERENCES OF PEOPLE WITH NON-SMALL CELL LUNG CANCER**

To assist you, we will use the following color-coding for the severity of side effects:

To understand your treatment preferences we will present you with pairs of treatments that have different outcomes. These treatments will vary across:

- Progression free survival (PFS)
- Short-term side effects
- Long-term side effects

PFS will be measured in months but side effects will be presented across different levels of severity.

| None |
| --- |
| Mild |
| Moderate |
| Severe |

***Progression free survival***

Progression free survival (PFS) means that there is still cancer in the body, but the cancer is not getting worse. PFS is defined clinically so it may not reflect how a person feels. Time with PFS is an average, some people will experience PFS for a shorter time than described, and others will experience it for a longer time. For the purposes of this survey PFS will vary, but you can consider overall survival fixed. On average, the treatment can cause one of three levels of progression free survival (PFS):

- 6 months
- 12 months
- 18 months

***Short-term side effects***:

| When taking a treatment you may develop short-term side effects such as nausea, vomiting, and infection for as long as you take the treatment. These side effects will go away soon after you finish treatment. The different levels of short-term side effects include: | |
| --- | --- |
| Mild | - Noticeable, does not affect daily activities |
| Moderate | - Uncomfortable, affects daily activities |
| Severe | - Life-threatening, requires intense medical care |

**Example 1:** Sarah was shown the following two treatments and was asked which person she believed was better off. In her opinion, Person B was better off.

| **Attributes** | **Person A** | **Person B** |
| --- | --- | --- |
| **Progression free survival** | 6 | 12 |
| **Short-term** side effects | Moderate | Mild |
| Who do **you** think is better off? | **☐** | 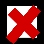 |

**LONG-TERM EFFECTS**

***Physical long-term effects***

| Treatments might cause physical long-term effects such neuropathy, chronic pain, muscle weakness, and/or tiredness/fatigue that may never go away. The different levels of physical long-term effects include: | |
| --- | --- |
| None | - No physical effects |
| Mild | - No effect on daily activities |
| Moderate | - Difficulty with daily activities |

***Emotional long-term effects***

| Treatments might cause emotional long-term effects such as feeling sad, depressed, and anxious and/or having fear of recurrence that may never go away. The different levels of emotional long-term effects include: | |
| --- | --- |
| None | - No emotional effects |
| Mild | - No effect on daily activities |
| Moderate | - Difficulty with daily activities |

***Now it is your turn***

**Example 2:** Given their treatment outcomes, which person do you believe is better off? Mark the box for the person you think is better off.

| **Attributes** | **Person A** | **Person B** |
| --- | --- | --- |
| **Progression free survival** | 6 | 12 |
| **Short-term** side effects | Mild | Severe |
| **Physical** long-term effects | Moderate | Mild |
| **Emotional** long-term effects | None | Moderate |
| Who do **you** think is better off? | **☐** | **☐** |

**LONG-TERM EFFECTS CONTINUED**

***Cognitive long-term effects***

| Treatments might cause cognitive long-term effects such as problems concentrating, multitasking, and/or understanding or remembering things that may never go away. The different levels of cognitive long-term effects include: | |
| --- | --- |
| None | - No cognitive effects |
| Mild | - No effect on daily activities |
| Moderate | - Difficulty with daily activities |

***Functional long-term effects***

| Treatments might cause functional long-term effects such as difficulty at work, in social settings, or with your family that may never go away. The different levels of functional long-term effects include: | |
| --- | --- |
| None | - No functional effects |
| Mild | - No effect on daily activities |
| Moderate | - Difficulty with daily activities |

***Now it is your turn***

You will be shown 13 tasks. In each task you will be presented with two patients, Patient A and Patient B. You will see a summary of the outcomes each of them achieved after treatment. Person A and Person B are the same except for the outcomes listed.

Please select the person you think is better off given their treatment outcomes.

Some profiles may not seem realistic or may sound bad. Regardless, please answer all of the questions as best as you can; there are no right or wrong answers.

Task 1: Please select the person you think is better off.

| **Attributes** | **Person A** | **Person B** |
| --- | --- | --- |
| **Progression free survival** | 18 | 6 |
| **Short-term** side effects | Severe | Moderate |
| **Physical** long-term effects | Mild | None |
| **Emotional** long-term effects | None | Moderate |
| **Cognitive** long-term effects | None | Moderate |
| **Functional** long-term effects | Mild | None |
| Who do **you** think is better off? | **☐** | **☐** |

Task 2: Please select the person you think is better off.

| **Attributes** | **Person A** | **Person B** |
| --- | --- | --- |
| **Progression free survival** | 6 | 18 |
| **Short-term** side effects | Mild | Moderate |
| **Physical** long-term effects | Mild | None |
| **Emotional** long-term effects | Moderate | None |
| **Cognitive** long-term effects | None | Moderate |
| **Functional** long-term effects | None | Mild |
| Who do **you** think is better off? | **☐** | **☐** |

Task 3: Please select the person you think is better off.

| **Attributes** | **Person A** | **Person B** |
| --- | --- | --- |
| **Progression free survival** | 6 | 12 |
| **Short-term** side effects | Mild | Moderate |
| **Physical** long-term effects | None | Moderate |
| **Emotional** long-term effects | None | Moderate |
| **Cognitive** long-term effects | Mild | None |
| **Functional** long-term effects | Moderate | Mild |
| Who do **you** think is better off? | **☐** | **☐** |

Task 4: Please select the person you think is better off.

| **Attributes** | **Person A** | **Person B** |
| --- | --- | --- |
| **Progression free survival** | 12 | 18 |
| **Short-term** side effects | Severe | Mild |
| **Physical** long-term effects | None | Moderate |
| **Emotional** long-term effects | Mild | None |
| **Cognitive** long-term effects | Mild | None |
| **Functional** long-term effects | Mild | Moderate |
| Who do **you** think is better off? | **☐** | **☐** |

Task 5: Please select the person you think is better off.

| **Attributes** | **Person A** | **Person B** |
| --- | --- | --- |
| **Progression free survival** | 6 | 12 |
| **Short-term** side effects | Moderate | Mild |
| **Physical** long-term effects | Moderate | None |
| **Emotional** long-term effects | None | Mild |
| **Cognitive** long-term effects | Mild | None |
| **Functional** long-term effects | None | Moderate |
| Who do **you** think is better off? | **☐** | **☐** |

Task 6: Please select the person you think is better off.

| **Attributes** | **Person A** | **Person B** |
| --- | --- | --- |
| **Progression free survival** | 6 | 18 |
| **Short-term** side effects | Mild | Severe |
| **Physical** long-term effects | Moderate | None |
| **Emotional** long-term effects | Mild | Moderate |
| **Cognitive** long-term effects | Moderate | Mild |
| **Functional** long-term effects | Mild | None |
| Who do **you** think is better off? | **☐** | **☐** |

Task 7: Please select the person you think is better off.

| **Attributes** | **Person A** | **Person B** |
| --- | --- | --- |
| **Progression free survival** | 12 | 6 |
| **Short-term** side effects | Mild | Moderate |
| **Physical** long-term effects | None | Mild |
| **Emotional** long-term effects | None | Mild |
| **Cognitive** long-term effects | Moderate | Mild |
| **Functional** long-term effects | None | Moderate |
| Who do **you** think is better off? | **☐** | **☐** |

Task 8: Please select the person you think is better off.

| **Attributes** | **Person A** | **Person B** |
| --- | --- | --- |
| **Progression free survival** | 18 | 6 |
| **Short-term** side effects | Mild | Severe |
| **Physical** long-term effects | Moderate | Mild |
| **Emotional** long-term effects | Moderate | None |
| **Cognitive** long-term effects | Mild | Moderate |
| **Functional** long-term effects | Mild | None |
| Who do **you** think is better off? | **Person A ☐** | **Person B ☐** |

**You are more than halfway done with this section. Please make sure that you consider all six aspects of the medications in your choices.**

Task 9: Please select the person you think is better off.

| **Attributes** | **Person A** | **Person B** |
| --- | --- | --- |
| **Progression free survival** | 18 | 12 |
| **Short-term** side effects | Moderate | Severe |
| **Physical** long-term effects | Mild | Moderate |
| **Emotional** long-term effects | Mild | None |
| **Cognitive** long-term effects | None | Mild |
| **Functional** long-term effects | None | Moderate |
| Who do **you** think is better off? | **☐** | **☐** |

Task 10: Please select the person you think is better off.

| **Attributes** | **Person A** | **Person B** |
| --- | --- | --- |
| **Progression free survival** | 12 | 6 |
| **Short-term** side effects | Moderate | Severe |
| **Physical** long-term effects | Mild | Moderate |
| **Emotional** long-term effects | Moderate | Mild |
| **Cognitive** long-term effects | Moderate | None |
| **Functional** long-term effects | Moderate | None |
| Who do **you** think is better off? | **☐** | **☐** |

Task 11: Please select the person you think is better off.

| **Attributes** | **Person A** | **Person B** |
| --- | --- | --- |
| **Progression free survival** | 6 | 12 |
| **Short-term** side effects | Severe | Mild |
| **Physical** long-term effects | None | Mild |
| **Emotional** long-term effects | Moderate | Mild |
| **Cognitive** long-term effects | None | Mild |
| **Functional** long-term effects | Moderate | None |
| Who do **you** think is better off? | **☐** | **☐** |

Task 12: Please select the person you think is better off.

| **Attributes** | **Person A** | **Person B** |
| --- | --- | --- |
| **Progression free survival** | 12 | 18 |
| **Short-term** side effects | Moderate | Mild |
| **Physical** long-term effects | None | Mild |
| **Emotional** long-term effects | None | Moderate |
| **Cognitive** long-term effects | None | Moderate |
| **Functional** long-term effects | None | Mild |
| Who do **you** think is better off? | **☐** | **☐** |

Task 13: Please select the person you think is better off.

| **Attributes** | **Person A** | **Person B** |
| --- | --- | --- |
| **Progression free survival** | 18 | 6 |
| **Short-term** side effects | Severe | Mild |
| **Physical** long-term effects | Moderate | None |
| **Emotional** long-term effects | Mild | None |
| **Cognitive** long-term effects | Moderate | None |
| **Functional** long-term effects | Moderate | Mild |
| Who do **you** think is better off? | **☐** | **☐** |

1. These statements refer to the questions that asked you to choose between outcomes for lung cancer treatments. Please mark your answers in the grid.

|  | Strongly disagree | Disagree | Neither | Agree | Strongly agree |
| --- | --- | --- | --- | --- | --- |
| I found it easy to understand the questions | **☐** | **☐** | **☐** | **☐** | **☐** |
| I found it easy to answer all the questions | **☐** | **☐** | **☐** | **☐** | **☐** |
| I answered all questions consistent with my preferences | **☐** | **☐** | **☐** | **☐** | **☐** |
